# Supplementary material for: Coccolith arrangement follows Eulerian mathematics in the coccolithophore Emiliania huxleyi
Source: PeerJ. 2018 Apr 9;6:e4608. doi: 10.7717/peerj.4608 (PMC5896503; doi:10.7717/peerj.4608)
Supplement: Supplemental Information 1 [file peerj-06-4608-s001.xlsx]

## Sheet: coccolith DSL DSW
coccolith geometry				stastics
DSL(µm)	DSW (µm)	DSW/DSL		DSL(µm)	DSW (µm)	DSW/DSL
3.6433	3.09485	0.849462	max	4.38144	3.92784	0.987047
3.19588	2.47629	0.774839	min	2.05155	1.34021	0.616858
3.01134	2.40412	0.798357
3.52371	2.83608	0.804857	avg	3.04519	2.44894	0.805332
2.80412	2.55258	0.910294	std	0.395201	0.369049	0.0740164
2.07423	1.75258	0.84493
3.11649	2.49175	0.799537
3.31959	2.80412	0.84472
3.43196	2.66082	0.775308
3.06186	2.55258	0.83367
3.74845	3.03196	0.808856
3.5433	3.33918	0.942392
3.20722	2.77423	0.864995
2.61031	1.90103	0.728278
2.7299	1.90103	0.696375
3.14227	2.84433	0.905184
3.23711	2.70619	0.835987
3.27423	2.67423	0.816751
3.71753	2.79072	0.750693
2.77629	2.12268	0.764575
2.87526	2.08763	0.726067
3.14227	3.01134	0.958333
2.91959	2.41546	0.827331
3.29897	2.57938	0.781875
2.76598	2.03299	0.734998
3.30103	2.35052	0.712055
3.83711	2.79072	0.727297
4.02577	3.50103	0.869654
3.19794	2.38041	0.744358
2.12577	1.75258	0.824442
2.40722	1.83505	0.762313
2.91959	2.20619	0.75565
2.88866	2.63402	0.911849
3.38144	2.54639	0.753049
2.63918	2.4433	0.925781
3.09278	2.08247	0.673333
2.81443	2.17526	0.772894
3.42268	2.57732	0.753012
3.20619	2.37113	0.73955
2.90722	2.05155	0.705674
2.95876	2.21649	0.749129
3	2.37113	0.790378
2.89691	2.26804	0.782918
2.57732	1.75258	0.68
3.36082	3	0.892638
3.12371	2.17526	0.69637
2.58763	2.31959	0.896414
3.80412	2.85567	0.750678
3.61856	2.63918	0.729345
2.74227	2.20619	0.804511
2.90722	2.25773	0.776596
3.23711	2.46392	0.761146
2.94845	2.35052	0.797203
3.42268	2.78351	0.813253
3.10309	2.70103	0.870432
3.12371	2.30928	0.739274
2.92784	2.34021	0.799296
3.28866	2.80412	0.852665
2.94845	2.72165	0.923077
3.52577	2.70103	0.766082
2.94845	2.25773	0.765734
3.1134	2.40206	0.771523
2.25773	2.04124	0.90411
3.45361	2.65979	0.770149
2.70103	2.18557	0.80916
2.51546	2.21649	0.881148
2.96907	2.47423	0.833333
3.4433	3.13402	0.91018
2.70103	2.34021	0.866412
2.70103	2.06186	0.763359
2.96907	2.20619	0.743056
3.07216	2.48454	0.808725
2.95876	2.37113	0.801394
2.7732	2.37113	0.855019
2.54639	2.20619	0.866397
3.13402	2.96907	0.947368
2.62887	2.2268	0.847059
2.69072	1.65979	0.616858
3.41237	2.85567	0.836858
3.3299	2.53608	0.76161
2.86598	2.20619	0.769784
2.78351	2.5567	0.918519
3.01031	2.20619	0.732877
3.06186	2.34021	0.76431
2.74227	2.05155	0.74812
3.03093	2.57732	0.85034
3.10309	2.28866	0.737542
3.59794	2.62887	0.730659
3.40206	2.68041	0.787879
2.91753	2.07216	0.710247
3.72165	2.70103	0.725762
3.39175	2.41237	0.711246
3.07216	2.5567	0.832215
2.8866	2.35052	0.814286
3.60825	2.92784	0.811429
3.59794	3.16495	0.879656
3.19588	2.47423	0.774194
3.29897	2.5567	0.775
3.60825	2.78351	0.771429
2.95876	2.68041	0.905923
3.10309	2.8866	0.930233
3.39175	3.13402	0.924012
3.91753	3.19588	0.815789
3.78351	2.7732	0.73297
3.81443	2.98969	0.783784
2.7732	2.4433	0.881041
2.43956	1.98901	0.815315
3.82474	2.83505	0.74124
3.42268	2.91753	0.85241
3.09278	2.70103	0.873333
3.19588	2.48454	0.777419
3.21649	2.7732	0.862179
2.40206	2.06186	0.858369
2.74227	2.35052	0.857143
3.91753	3.20619	0.818421
2.62887	2.17526	0.827451
3.17526	2.40206	0.756494
3.28866	2.78351	0.846395
2.91753	2.58763	0.886926
3.15464	2.49485	0.79085
2.7732	2.48454	0.895911
3.72165	2.94845	0.792244
2.68041	2.16495	0.807692
3.10309	2.37113	0.76412
2.96907	2.27835	0.767361
3.03093	2.38144	0.785714
2.63918	2.03093	0.769531
2.54639	2.28866	0.898785
3.36082	3.15464	0.93865
2.72165	2.37113	0.871212
2.18557	1.65979	0.759434
2.97938	2.10309	0.705882
3.41237	2.72165	0.797583
2.72165	2.26804	0.833333
3.20619	2.92784	0.913183
3.49485	2.84536	0.814159
3.09278	2.26804	0.733333
3.40206	2.57732	0.757576
2.7732	2.40206	0.866171
3.07216	2.26804	0.738255
3.50515	2.86598	0.817647
3.10309	2.16495	0.697674
3.61856	2.80412	0.774929
3.25773	2.45361	0.753165
2.35052	1.91753	0.815789
2.35052	1.84536	0.785088
3.10309	2.18557	0.704319
3.25773	2.59794	0.797468
2.7732	2.34021	0.843866
2.96907	2.68041	0.902778
3	2.27835	0.75945
3.20619	2.47423	0.771704
3.38144	2.49485	0.737805
3.29897	2.41237	0.73125
3.3299	2.51546	0.755418
3.2268	2.85567	0.884984
3.27835	2.40206	0.732704
2.35052	2.12371	0.903509
3.2268	2.39175	0.741214
3.52577	2.7732	0.78655
3.23711	2.72165	0.840764
3.07216	2.3299	0.758389
3.40206	2.95876	0.869697
3.27835	2.5567	0.779874
3.72165	3.28866	0.883657
3.09278	2.37113	0.766667
2.40206	1.94845	0.811159
3.54639	2.49485	0.703488
2.93814	2.27835	0.775439
2.90722	2.40206	0.826241
3.17526	2.80412	0.883117
3.45361	2.47423	0.716418
3.3299	2.58763	0.77709
2.8866	2.46392	0.853571
2.62887	2.49485	0.94902
3.36082	2.70103	0.803681
3.51546	3.41237	0.970674
3.49485	3.20619	0.917404
3.09278	2.27835	0.736667
2.62887	2	0.760784
2.7732	2.45361	0.884758
3.2268	2.49485	0.773163
2.68041	2.21649	0.826923
3.70103	3.05155	0.824513
3.02062	2.18557	0.723549
3.12967	2.83077	0.904494
2.92784	2.19072	0.748239
2.67526	2.5	0.934489
3.15979	2.90722	0.920065
2.7268	2.15464	0.79017
2.64948	2.33505	0.881323
3.24742	2.44845	0.753968
3.02062	2.43299	0.805461
3.09794	2.40722	0.777038
3.13918	2.34021	0.745484
3.08763	2.36082	0.764608
3.09278	2.44845	0.791667
2.69072	1.86598	0.693487
2.15464	2.02577	0.940191
2.90722	1.97938	0.680851
2.43299	1.6701	0.686441
2.65979	2.02062	0.75969
3.62371	2.58247	0.71266
2.60825	2.1701	0.832016
2.68041	1.91753	0.715385
2.80928	2.44845	0.87156
3.02577	2.51546	0.831346
2.78866	2.11856	0.759704
2.34536	1.98454	0.846154
2.68041	2.51546	0.938462
2.91753	2.62887	0.90106
2.79897	2.17526	0.777164
2.41753	2.25258	0.93177
3.09794	2.42268	0.78203
2.60309	2.23711	0.859406
3.34021	2.63402	0.78858
3.06186	2.51546	0.821549
2.60825	1.95876	0.750988
2.93814	2.5	0.850877
2.77835	2.38144	0.857143
3.06701	2.46907	0.805042
2.85567	2.41237	0.844765
2.8866	2.1134	0.732143
2.85052	2.30412	0.808318
3.04124	2.59278	0.852542
2.35567	1.9433	0.824945
2.71134	2.27835	0.840304
2.75773	2.03093	0.736449
3.12371	2.43814	0.780528
2.3299	1.96907	0.845133
3.08763	2.78866	0.903172
3.02577	2.19072	0.72402
3.15979	2.39691	0.758564
2.85052	2.36082	0.82821
2.64948	1.91237	0.72179
2.97423	2.38144	0.800693
2.75258	2.38144	0.865169
2.75773	2.1134	0.766355
2.7732	1.95361	0.704461
2.82474	2.24742	0.79562
3.38144	2.56701	0.759146
2.83505	2.06186	0.727273
2.98969	2.21649	0.741379
3.42784	2.52577	0.736842
2.5	2.31443	0.925773
2.42268	2.04639	0.844681
2.1134	1.5	0.709756
2.95361	1.95876	0.663176
3.06186	2.83505	0.925926
2.38144	1.80928	0.75974
2.90206	2.29897	0.792185
2.68041	2.01031	0.75
2.15464	1.8299	0.849282
2.81959	2.53608	0.899452
2.19588	1.88144	0.856808
2.94845	2.36082	0.800699
2.98454	2.26289	0.758204
3.14433	2.16495	0.688525
2.84536	2.37629	0.835145
2.49485	1.70619	0.683884
2.44845	1.8299	0.747368
2.74742	2.69072	0.979362
2.46907	2.07732	0.841336
2.82474	2.21649	0.784672
2.1134	1.65464	0.782927
2.52577	1.86598	0.738776
2.94845	2.16495	0.734266
3.70619	2.98454	0.805285
2.44845	2.16495	0.884211
3.16495	2.2268	0.703583
2.47938	2.19588	0.885655
2.74742	2.42268	0.881801
3.06701	2.44845	0.798319
2.98454	2.18557	0.732297
3.13402	2.63402	0.840461
3.13918	2.40206	0.765189
2.75773	2.39691	0.869159
3.32474	2.78351	0.837209
2.73196	2.22165	0.813208
3.41237	2.51546	0.73716
2.74227	2.04124	0.744361
2.29897	1.68041	0.730942
2.68041	2.02577	0.755769
2.75258	2.26804	0.82397
3.30412	2.47423	0.74883
2.58763	1.75258	0.677291
3.12887	2.3299	0.744646
2.75773	1.97423	0.715888
2.84536	2.29897	0.807971
2.62371	2.11856	0.807466
2.73711	2.15464	0.787194
2.51546	2.28351	0.907787
2.90722	2.46392	0.847518
2.57732	1.90722	0.74
2.37629	1.90206	0.800434
2.65979	2.47938	0.932171
2.7732	2.07732	0.749071
3.09278	2.83505	0.916667
2.7732	2.40206	0.866171
2.86082	2.1134	0.738739
3.23711	2.3866	0.737261
3.01546	2.23711	0.74188
2.63918	1.92784	0.730469
2.33505	1.74227	0.746137
2.49485	2.1134	0.847107
3	2.21649	0.738832
2.3299	2.12887	0.913717
2.39691	2.14948	0.896774
3.19588	2.21649	0.693548
3.01546	2.43299	0.806838
2.63918	2.10309	0.796875
2.81959	2.21649	0.786106
2.78351	2.12371	0.762963
3.0567	2.34021	0.765599
2.47938	1.84021	0.742204
2.58763	2.17526	0.840637
3.66495	3.54124	0.966245
2.98454	2.32474	0.778929
3.45876	2.82474	0.816692
2.80412	2.21134	0.788603
2.43299	1.90722	0.783898
2.57732	2.31959	0.9
2.99485	2.16495	0.722892
2.35567	2.12371	0.901532
3.24742	2.40206	0.739683
3.25773	2.53608	0.778481
2.6701	2.21649	0.830116
3.36082	2.70103	0.803681
3.17526	2.2268	0.701299
2.94845	2.63918	0.895105
3.51546	2.98969	0.85044
3.2268	2.58763	0.801917
3.14433	2.91753	0.927869
2.96907	2.41237	0.8125
3.09278	2.26804	0.733333
2.95876	2.63918	0.891986
3.41237	2.58763	0.758308
3.25773	2.52577	0.775316
3.15464	2.59794	0.823529
2.54639	1.89691	0.744939
2.95876	2.40206	0.811847
3.13402	2.2268	0.710526
3.40206	3.19588	0.939394
2.91753	2.15464	0.738516
3.27835	3.03093	0.924528
3.06186	2.49485	0.814815
3.06186	2.34021	0.76431
3.01031	2.46392	0.818493
2.6701	2.16495	0.810811
3.23711	2.35052	0.726115
2.96907	2.74227	0.923611
3.06186	2.48454	0.811448
2.85567	2.3299	0.815884
2.70103	2.16495	0.801527
3.29897	2.57732	0.78125
2.98969	2.27835	0.762069
2.96907	1.94845	0.65625
4.08247	2.91753	0.714646
3.18557	2.37113	0.744337
2.57732	1.94845	0.756
2.68041	2.16495	0.807692
2.40206	1.89691	0.7897
2.54639	2.21649	0.870445
2.37113	1.64948	0.695652
2.40206	2.19588	0.914163
2.2268	2.05155	0.921296
3.61856	2.69072	0.74359
2.58763	1.80412	0.697211
3.06186	2.31959	0.757576
3.02062	2.17526	0.720137
2.12371	1.7732	0.834951
2.8866	2.16495	0.75
2.58763	2.08247	0.804781
2.90722	2.54639	0.875887
2.49485	2.21649	0.88843
2.72165	1.98969	0.731061
2.7732	2.10309	0.758364
2.91753	1.96907	0.674912
2.27835	1.6701	0.733032
2.94845	2.26804	0.769231
2.98969	2.26804	0.758621
2.5567	2.28866	0.895161
3.69072	3.18557	0.863128
3.20619	2.63918	0.823151
3.06186	2.40206	0.784512
2.26804	1.80412	0.795455
3.06186	2.5567	0.835017
3.36082	2.60825	0.776074
3.54639	2.92784	0.825581
2.57732	1.97938	0.768
3.18557	2.94845	0.925566
2.68041	1.80412	0.673077
2.78351	2.12371	0.762963
3.20619	2.85567	0.890675
2.47423	2.16495	0.875
2.49485	1.89691	0.760331
3.17526	2.62887	0.827922
2.68041	2.06186	0.769231
2.51546	2.08247	0.827869
3.03093	2.15464	0.710884
3.19588	2.8866	0.903226
3.10309	2.45361	0.790698
2.8866	2.57732	0.892857
2.90722	2.58763	0.890071
3.73196	2.94845	0.790055
2.59794	2.40206	0.924603
3.19588	2.37113	0.741935
2.91753	1.87629	0.64311
3.16495	2.62887	0.830619
2.89691	2.07216	0.715302
3.75258	2.57732	0.686813
2.72165	2.49485	0.916667
3.41237	2.58763	0.758308
2.40206	2.21649	0.922747
3.13402	2.90722	0.927632
2.97938	2.57732	0.865052
3.48454	2.38144	0.683432
3.13402	2.5567	0.815789
3.50515	2.85567	0.814706
2.73196	2.02062	0.739623
3.01031	2.5567	0.849315
2.54639	2.16495	0.850202
3	2.47423	0.824742
2.60825	2.35052	0.901186
2.40206	1.6701	0.695279
3.50515	3.06186	0.873529
2.79381	1.86598	0.667897
2.7732	2.20619	0.795539
2.80412	1.78351	0.636029
3.03093	2.18557	0.721088
2.68041	2.15464	0.803846
2.68041	1.89691	0.707692
2.90722	2.62887	0.904255
2.8866	2.57732	0.892857
2.85567	2.26804	0.794224
2.83505	2.08247	0.734545
2.85567	2.49485	0.873646
3.06186	2.64948	0.86532
2.72165	2.40206	0.882576
3.50515	3.19588	0.911765
2.62887	2.1134	0.803922
3.36082	3.29897	0.981595
3.38144	3.23711	0.957317
3.41237	2.70103	0.791541
3.23711	2.45361	0.757962
3.03093	2.80412	0.92517
2.91753	2.28866	0.784452
3.01031	2.51546	0.835616
2.72165	2.59794	0.954545
2.8866	1.95876	0.678571
2.57732	1.95876	0.76
2.98969	2.16495	0.724138
2.65979	2.12371	0.79845
2.60825	2.02062	0.774704
3.17526	2.57732	0.811688
2.7732	2.43299	0.877323
2.83505	2.48454	0.876364
2.76289	2.31959	0.839552
2.81443	1.96907	0.699634
2.39175	1.85567	0.775862
3.41237	2.78351	0.81571
2.6701	2.03093	0.760618
3	2.48454	0.828179
2.63918	2.25773	0.855469
2.75258	2.38144	0.865169
3.27835	2.97938	0.908805
2.72165	2.28866	0.840909
2.40206	1.82474	0.759657
2.48454	1.95876	0.788382
3.75258	2.47423	0.659341
3.75258	3	0.799451
2.81443	2.12371	0.754579
4.08247	3.19588	0.782828
3.50515	2.47423	0.705882
2.7732	2.38144	0.858736
2.59794	2.39175	0.920635
3.27835	3	0.915094
2.35052	1.84536	0.785088
2.91753	2.27835	0.780919
2.75258	1.85567	0.674157
3.25773	2.35052	0.721519
3.50515	2.68041	0.764706
2.26804	2.06186	0.909091
3	2.83505	0.945017
3.25773	2.38144	0.731013
3.17526	2.28866	0.720779
2.90722	2.16495	0.744681
3.54639	2.96907	0.837209
3.36082	2.42268	0.720859
3.54639	3	0.84593
2.72165	2.21649	0.814394
3.01031	2.08247	0.691781
2.90722	2.54639	0.875887
2.85567	2.35052	0.823105
2.74227	2.16495	0.789474
3.23711	2.65979	0.821656
3.20619	2.80412	0.874598
2.83505	2.54639	0.898182
2.95876	2.51546	0.850174
2.90722	2.47423	0.851064
3.25773	2.35052	0.721519
2.69072	1.94845	0.724138
3.48571	2.84176	0.815259
2.4989	2.24615	0.898857
2.57143	2.11429	0.822222
4.24742	3.51546	0.82767
4.12371	3.09278	0.75
3.13402	2.3299	0.743421
3.15464	2.50515	0.794118
3.20619	2.07216	0.646302
3.2268	2.49485	0.773163
3.57732	2.72165	0.760807
3.13402	2.28866	0.730263
3.46392	3.09278	0.892857
2.57732	2.37113	0.92
2.72165	2.08247	0.765152
2.58763	1.89691	0.733068
3.01031	2.03093	0.674658
2.70103	2.18557	0.80916
2.86598	2.19588	0.766187
2.35052	1.85567	0.789474
2.85567	2.27835	0.797834
3.59794	2.75258	0.765043
2.54639	2.12371	0.834008
2.7732	2.25773	0.814126
2.86598	2.20619	0.769784
3.60825	2.69072	0.745714
4	3.03093	0.757732
3.10309	2.37113	0.76412
2.37113	1.96907	0.830435
2.85567	2.57732	0.902527
3.10309	2.17526	0.700997
2.37113	2.04124	0.86087
3.5567	2.73196	0.768116
2.51546	1.62887	0.647541
2.72165	2.54639	0.935606
2.78351	2.20619	0.792593
2.70103	1.89691	0.70229
3.23711	2.37113	0.732484
2.79381	2.07216	0.741697
2.80412	2.25773	0.805147
2.51546	1.75258	0.696721
3.40206	2.57732	0.757576
2.72527	2.35604	0.864516
2.74725	2.27692	0.8288
3.10769	2.3011	0.740453
3.54945	2.71868	0.765944
2.9011	2.51648	0.867424
2.66374	1.91648	0.719472
2.68571	2.11429	0.787234
2.63516	1.92527	0.730609
2.88132	2.02198	0.701754
2.63736	1.88132	0.713333
2.66593	2.01538	0.755977
2.38022	2.04835	0.860572
3.24176	2.67692	0.825763
2.7033	2.08571	0.771545
3.14433	2.7732	0.881967
3.06186	2.31959	0.757576
2.37113	2.06186	0.869565
2.78351	1.95876	0.703704
2.58763	2.35052	0.908367
2.91753	2.28866	0.784452
3.48454	3.01031	0.863905
2.98969	2.16495	0.724138
2.92784	2.28866	0.78169
3.2268	2.35052	0.728435
3.17526	2.40206	0.756494
2.78351	2.16495	0.777778
3.41237	2.48454	0.728097
3	1.95876	0.652921
3.19588	3.01031	0.941935
3.31959	2.86598	0.863354
2.94845	2.21649	0.751748
3.20619	2.52577	0.787781
2.08247	1.89691	0.910891
3.29897	2.47423	0.75
3.19588	2.52577	0.790323
3.27835	2.60825	0.795597
3.23711	2.28866	0.707006
3	2.49485	0.831615
3	2.34021	0.780069
2.35052	2.08247	0.885965
2.79381	2.07216	0.741697
3.64948	3.36082	0.920904
2.49485	2.21649	0.88843
2.96907	2.45361	0.826389
3.36082	2.98969	0.889571
3.27835	2.47423	0.754717
2.91753	2.47423	0.848057
3.34021	2.72165	0.814815
2.78351	1.85567	0.666667
3.06186	2.40206	0.784512
3.31959	2.65979	0.801242
2.98969	2.78351	0.931034
3.74227	3.10309	0.829201
3.25773	2.38144	0.731013
2.63918	2.03093	0.769531
3.23711	2.62887	0.812102
3.71134	2.78351	0.75
2.70103	2.12371	0.78626
3.25773	2.85567	0.876582
2.8866	2.16495	0.75
3.34021	2.49485	0.746914
3.34021	2.50515	0.75
3.14433	2.41237	0.767213
2.21649	1.80412	0.813953
2.91753	2.1134	0.724382
3.28866	2.70103	0.821317
2.21649	1.76289	0.795349
2.90722	2.54639	0.875887
2.72165	2.2268	0.818182
2.81443	1.98969	0.70696
3.18557	2.4433	0.76699
3.54639	2.90722	0.819767
3.13402	2.83505	0.904605
3.05155	2.3299	0.763514
4.19588	3.18557	0.759214
3.60825	2.68041	0.742857
3.72165	2.64948	0.711911
2.59794	2.39175	0.920635
3.20619	2.59794	0.810289
3.13402	2.24742	0.717105
3.57732	3.06186	0.855908
4.18557	3.31959	0.793103
3.46392	2.68041	0.77381
3.31959	2.72165	0.819876
4.3299	3.29897	0.761905
3.19588	2.90722	0.909677
3.31959	2.90722	0.875776
3.81443	2.78351	0.72973
2.91753	2.49485	0.855124
3.31959	2.58763	0.779503
2.83505	2.43299	0.858182
3.54639	3.20619	0.90407
3.36082	2.62887	0.782209
2.94845	2.62887	0.891608
3.2268	2.40206	0.744409
2.87629	2.58763	0.899642
3.01031	2.52577	0.839041
3.10309	2.90722	0.936877
3.13402	2.30928	0.736842
2.63918	2.06186	0.78125
2.91753	2.35052	0.805654
3.1134	2.80412	0.900662
3.52577	2.91753	0.827485
3.06186	2.81443	0.919192
2.87629	2.45361	0.853047
3	2.35052	0.783505
2.57732	2.37113	0.92
3.15464	2.7732	0.879085
3.51546	2.95876	0.841642
2.60825	1.95876	0.750988
2.98969	2.40206	0.803448
3.14433	2.49485	0.793443
2.68041	1.85567	0.692308
2.5567	2.18557	0.854839
4.15464	3.59794	0.866005
2.60825	2.20619	0.84585
2.18557	2.07216	0.948113
2.8866	2.16495	0.75
2.8866	2.06186	0.714286
3.61856	2.69072	0.74359
3.82474	3.61856	0.946092
3.41237	2.28866	0.670695
3.2268	2.37113	0.734824
3.42268	2.64948	0.774096
2.60825	1.78351	0.683794
2.76289	2.54639	0.921642
4.03093	3.19588	0.792839
3.65979	3.38144	0.923944
2.91753	2.59794	0.890459
3.03093	2.27835	0.751701
3.09278	2.49485	0.806667
3.27835	2.52577	0.77044
2.98969	2.5567	0.855172
3.64948	2.71134	0.742938
3.31959	2.95876	0.891304
3.39175	3.23711	0.954407
3.64948	3.13402	0.858757
4.06186	3.91753	0.964467
3.72165	3.06186	0.822715
2.48454	1.89691	0.763485
3.51546	2.8866	0.821114
4.02062	2.98969	0.74359
3.2268	2.7732	0.859425
3.59794	3.31959	0.922636
3.25773	2.64948	0.813291
2.98969	2.16495	0.724138
2.7732	2.25773	0.814126
3.36082	2.62887	0.782209
2.94845	2.57732	0.874126
3.13402	2.26804	0.723684
2.79381	2.16495	0.774908
2.90722	2.59794	0.893617
3.04124	2.49485	0.820339
3.7732	3.1134	0.825137
3.79381	3.18557	0.839674
2.91753	2.37113	0.812721
3.14433	2.70103	0.859016
2.57732	2.16495	0.84
2.59794	2.16495	0.833333
3.13402	2.5567	0.815789
3.86598	2.92784	0.757333
2.74227	2.43299	0.887218
2.86598	2.37113	0.827338
3.80412	3.02062	0.794038
3.23711	3.01031	0.929936
3.14433	2.54639	0.809836
3.06186	2.72165	0.888889
3.06186	2.84536	0.929293
3.06186	2.40206	0.784512
3.25773	2.63918	0.810127
2.8866	2.06186	0.714286
3.10309	2.31959	0.747508
3.06186	2.18557	0.713805
2.76289	2.21649	0.802239
3.57732	2.84536	0.795389
3.18557	2.51546	0.789644
3.07216	2.06186	0.671141
2.7732	2.3299	0.840149
3.03093	2.25773	0.744898
3.38144	2.54639	0.753049
2.7732	2.46392	0.888476
3.54639	2.52577	0.712209
3.3299	2.85567	0.857585
3.5567	2.60825	0.733333
2.75258	2.57732	0.93633
2.85567	2.64948	0.927798
2.60825	2.41237	0.924901
3.01031	2.72165	0.90411
3.12371	2.83505	0.907591
3.23711	2.39175	0.738854
2.73196	1.96907	0.720755
3.19588	2.63918	0.825806
3.20619	2.85567	0.890675
2.84536	2.40206	0.844203
2.71134	1.87629	0.692015
3.27835	2.45361	0.748428
3.27835	2.50515	0.764151
2.49485	2.07216	0.830579
2.91753	2.35052	0.805654
2.70103	2.35052	0.870229
2.83505	2.10309	0.741818
2.38144	1.92784	0.809524
3.23711	2.6701	0.824841
2.72165	2.12371	0.780303
3.31959	2.69072	0.810559
3.27835	2.54639	0.77673
2.95876	2.35052	0.794425
2.8866	2.70103	0.935714
2.63918	2.28866	0.867187
2.45361	1.70103	0.693277
2.70103	2.42268	0.896947
2.7732	2.30928	0.832714
2.91753	2.25773	0.773852
3.29897	2.54639	0.771875
2.63918	2.02062	0.765625
3.03093	2.12371	0.70068
3.79381	2.70103	0.711957
2.81443	2.40206	0.85348
2.91753	2.17526	0.745583
3.47423	2.8866	0.830861
3.09278	2.57732	0.833333
2.58763	1.80412	0.697211
3.12371	2.47423	0.792079
2.59794	2.20619	0.849206
3.94845	3.18557	0.806789
2.90722	2.62887	0.904255
3.25773	3.17526	0.974684
2.85567	2.34021	0.819495
3.36082	2.98969	0.889571
3.41237	2.37113	0.694864
3.37113	3.09278	0.917431
3.20619	2.26804	0.707395
3.30928	2.37113	0.716511
2.7732	2.1134	0.762082
2.62887	2.1134	0.803922
2.69072	2.53608	0.942529
2.94845	2.21649	0.751748
3.10309	2.77835	0.895349
3.10825	2.33505	0.751244
3.46907	2.58763	0.745914
2.98454	2.20103	0.737478
2.85567	2.60825	0.913357
3.21134	2.5567	0.796148
2.84021	1.95876	0.689655
3.03608	2.5567	0.842105
2.71134	2.40206	0.885932
2.58763	2.37629	0.918327
2.62887	2.01546	0.766667
3.04639	2.51546	0.825719
2.78866	2.1134	0.757856
3.50515	2.76804	0.789706
3.42268	2.67526	0.781627
2.45876	2.21649	0.901468
2.60825	2.12371	0.814229
2.18557	2.05155	0.938679
3.43299	2.7732	0.807808
2.20619	1.5567	0.705607
2.38144	1.75258	0.735931
3.29897	2.45361	0.74375
3.19588	2.37113	0.741935
3.51546	2.68041	0.762463
2.75258	2.47423	0.898876
2.86598	2.08247	0.726619
2.71134	1.96907	0.726236
2.62887	2.42268	0.921569
3.01031	2.6701	0.886986
2.58763	1.93814	0.749004
3.61856	2.90722	0.803419
3.01031	2.26804	0.753425
2.90722	2.68041	0.921986
3.09278	2.7732	0.896667
3.46392	3.18557	0.919643
2.5567	2.28866	0.895161
3.40206	2.7732	0.815152
2.76289	2.12371	0.768657
2.91753	2.71134	0.929329
2.72165	2.31959	0.852273
3.38144	2.76289	0.817073
4.08247	3.19588	0.782828
3.7732	3.34021	0.885246
3.20619	2.38144	0.742765
2.8866	2.46392	0.853571
2.7732	2.16495	0.780669
2.8866	1.95876	0.678571
3.01031	2.63918	0.876712
3.84536	2.93814	0.764075
2.51546	1.94845	0.77459
3.29897	2.57732	0.78125
3.30928	2.26804	0.685358
3.65979	3	0.819718
2.8866	2.28866	0.792857
3.07216	2.5567	0.832215
3.54615	2.6022	0.733808
3.21134	2.15464	0.670947
3.07732	2.34021	0.760469
3.34536	2.64948	0.791988
2.39691	2.14433	0.894624
2.93814	2.26804	0.77193
2.52577	2.2732	0.9
2.90206	2.26804	0.781528
2.43299	2.2732	0.934322
3.57732	2.91753	0.815562
3.80412	2.96392	0.779133
3.2732	2.78351	0.850394
3.20619	3.04639	0.950161
3.61856	2.93814	0.811966
3.5567	2.78351	0.782609
3.2268	2.47423	0.766773
3.16495	2.31959	0.732899
3.50515	2.58763	0.738235
3	2.34021	0.780069
3.07216	2.34021	0.761745
3.74227	2.70103	0.721763
3.29897	2.5567	0.775
3.57732	3.05155	0.853026
3.16495	2.18557	0.690554
4.01031	3.14433	0.784062
3.59794	2.58763	0.719198
3.50515	2.7732	0.791176
3.62887	2.91753	0.803977
3.60825	3.31959	0.92
3.39175	2.60825	0.768997
3.74227	2.83505	0.757576
3.59794	2.80412	0.77937
3.09278	2.37113	0.766667
2.17526	1.71134	0.78673
3.5567	2.57732	0.724638
2.90722	2.16495	0.744681
3.4433	2.70103	0.784431
2.68041	2.18557	0.815385
3.78351	2.97938	0.787466
3.42268	2.48454	0.725904
3.61856	2.68041	0.740741
3.72165	3.09278	0.831025
3.09278	2.37113	0.766667
3.42268	2.96907	0.86747
3.31959	2.48454	0.748447
3.1134	2.57732	0.827815
3.34021	2.86598	0.858025
3.20619	2.37113	0.73955
3.18557	2.96907	0.932039
3.04124	2.72165	0.894915
3.69451	3.18901	0.863177
3.52967	3.21099	0.909714
3.51648	2.6989	0.7675
3.50989	2.70989	0.772073
2.63516	2.4044	0.912427
3.41237	2.57732	0.755287
2.25773	1.75258	0.776256
2.48454	1.85567	0.746888
3.20619	2.2268	0.694534
2.86598	2.14433	0.748201
3.23711	3.03093	0.936306
3.01031	2.68041	0.890411
3.09278	2.47423	0.8
3.06186	2.5567	0.835017
3.30928	2.57732	0.778816
3.45361	2.45361	0.710448
3.52577	2.80412	0.795322
3.10309	2.79381	0.900332
3.07216	2.62887	0.855705
3.5567	2.57732	0.724638
3.92784	3.10309	0.790026
3.82474	2.91753	0.762803
3.13402	2.90722	0.927632
3.48454	2.64948	0.760355
2.70103	2.28866	0.847328
2.91753	2.49485	0.855124
2.68041	2.35052	0.876923
3.5567	2.59794	0.730435
3.51546	2.69072	0.765396
3.69072	3.07216	0.832402
3.31959	2.38144	0.717391
3.02062	2.07216	0.686007
4.04124	2.90722	0.719388
3.60825	2.72165	0.754286
2.52577	2.35052	0.930612
3.21649	2.84536	0.884615
3.4433	2.47423	0.718563
2.94845	2.03093	0.688811
2.62887	2.41237	0.917647
3.31959	3.03093	0.913043
2.91753	2.57732	0.883392
2.69072	1.87629	0.697318
3.75258	3.06186	0.815934
2.91753	2.10309	0.720848
3.52577	2.62887	0.745614
3.51546	3.04124	0.865103
3.28866	2.63918	0.802508
3.09278	2.47423	0.8
2.96907	2.27835	0.767361
3.79381	3.15464	0.831522
3.21649	2.3299	0.724359
3.29897	2.47423	0.75
3.04124	2.16495	0.711864
3.37113	2.35052	0.697248
3.10309	2.37113	0.76412
3.72165	2.78351	0.747922
3.19588	2.26804	0.709677
3.60825	3.09278	0.857143
3.31959	2.86598	0.863354
3.5567	2.68041	0.753623
2.8866	2.47423	0.857143
3.58763	2.54639	0.70977
3.72165	2.83505	0.761773
3.59794	3.18557	0.885387
3.70103	2.75258	0.743733
2.65979	2.2268	0.837209
3.75258	3	0.799451
3.61856	2.45361	0.678063
3.31959	2.65979	0.801242
3.2268	2.31959	0.71885
2.80412	2.60825	0.930147
2.96907	2.63918	0.888889
4.03093	3.09278	0.767263
2.7732	2.16495	0.780669
3.27835	2.5567	0.779874
2.98969	2.68041	0.896552
2.92784	2.26804	0.774648
2.94845	2.20619	0.748252
3.59794	2.68041	0.744986
3.20103	2.2268	0.695652
2.70619	2.10309	0.777143
2.42784	1.63918	0.675159
2.63402	2.4433	0.927593
3.13402	2.78351	0.888158
2.95361	2.07732	0.703316
3.31959	2.81443	0.847826
2.69072	1.98454	0.737548
2.62371	2.31959	0.884086
2.39691	1.91753	0.8
3.71649	2.84021	0.764216
3.56186	2.63402	0.739508
3.28351	3.03608	0.924647
3.09794	2.9433	0.950083
3.2268	2.78351	0.86262
3.03608	2.20619	0.726655
2.46907	2.31959	0.939457
3.25258	2.47938	0.762282
3.09278	2.90722	0.94
2.81443	2.56186	0.910256
3.44845	3.15979	0.916293
2.88144	2.33505	0.810376
3.59278	2.64948	0.737446
3.01031	2.45361	0.815068
3.34536	2.70619	0.808937
2.74742	2.48454	0.904315
2.74227	2.03093	0.740602
3.13402	2.47423	0.789474
3.3299	2.35052	0.705882
3.34021	2.78351	0.833333
3.58763	3.13402	0.873563
2.68041	2.37113	0.884615
3.35052	3.01031	0.898462
3.38144	2.40206	0.710366
3.19588	2.3299	0.729032
3.92784	2.98969	0.761155
2.89691	2.26804	0.782918
3.10309	2.06186	0.664452
3.28866	2.84536	0.865204
3.36082	2.62887	0.782209
2.8866	2.35052	0.814286
2.62887	2.04124	0.776471
3.72165	3.29897	0.886427
3.92784	3.09278	0.787402
2.92784	2.71134	0.926056
3.83505	2.80412	0.731183
3.01031	2.31959	0.770548
3.19588	2.37113	0.741935
3.29897	2.6701	0.809375
3.21649	2.49485	0.775641
2.28866	1.97938	0.864865
3.03093	2.48454	0.819728
3.09278	2.8866	0.933333
3.50515	2.98969	0.852941
3.28866	2.7732	0.84326
3.02062	2.27835	0.754266
3	2.41237	0.804124
2.91753	2.2268	0.763251
3.17526	2.96907	0.935065
3.07216	2.35052	0.765101
2.49485	2.30928	0.92562
3.06186	2.47423	0.808081
2.8866	2.16495	0.75
3.2268	2.72165	0.84345
3.36082	2.59794	0.773006
3.51546	2.8866	0.821114
3.62887	2.75258	0.758523
3.23711	2.59794	0.802548
3.07216	2.72165	0.885906
3.17526	2.43299	0.766234
3.28866	2.70103	0.821317
3.03093	2.83505	0.935374
3.68041	2.60825	0.708683
3.82474	2.63918	0.690027
2.86598	2.25773	0.78777
2.63918	2.2268	0.84375
3.02062	2.27835	0.754266
3.60825	2.8866	0.8
2.96907	2.58763	0.871528
3.46392	2.7732	0.800595
3.61856	3.06186	0.846154
3.81443	3.17526	0.832432
2.35052	1.80412	0.767544
3.85567	3.05155	0.791444
3.07216	2.5567	0.832215
3.57732	2.91753	0.815562
3.1134	2.74227	0.880795
2.85567	2.35052	0.823105
2.70103	2.3299	0.862595
2.91753	2.40206	0.823322
3.52577	2.74227	0.777778
3.20619	2.96907	0.926045
3.72165	3.13402	0.842105
3.82474	2.57732	0.673854
3.38144	3.20619	0.948171
3.25773	2.94845	0.905063
3.40206	3.13402	0.921212
2.79381	2.06186	0.738007
2.91753	2.47423	0.848057
4.02062	2.8866	0.717949
3.29897	2.57732	0.78125
3.31959	2.38144	0.717391
3.38144	2.58763	0.765244
3.19588	2.2268	0.696774
3.36082	2.57732	0.766871
4.03093	3.09278	0.767263
3.20619	2.37113	0.73955
2.59794	2.26804	0.873016
3.09278	2.7732	0.896667
3.38144	2.47423	0.731707
3.31959	2.69072	0.810559
2.90722	2.49485	0.858156
3.03093	2.35052	0.77551
3.84536	3.68041	0.957105
3.4433	2.39175	0.694611
3.63918	2.6701	0.733711
3.5567	2.72165	0.765217
3.72165	2.69072	0.722992
3.18557	2.47423	0.776699
3.51546	2.57732	0.733138
3.52577	2.38144	0.675439
4.01031	3.41237	0.8509
2.91753	2.62887	0.90106
3.48454	2.57732	0.739645
3	2.54639	0.848797
2.37113	2.27835	0.96087
3.42268	2.49485	0.728916
3.79381	3.25258	0.857337
3.23711	2.97423	0.91879
2.79381	2.26804	0.811808
2.98454	2.84021	0.951641
3.51546	3.1701	0.90176
3.36598	2.76289	0.820827
3.31959	2.58763	0.779503
3.37629	2.9433	0.871756
3.03608	2.35567	0.775891
3.58247	2.72165	0.759712
3.34021	2.8866	0.864198
2.7732	2.43299	0.877323
3.39175	2.91753	0.860182
3.2268	2.76804	0.857827
3.37629	2.88144	0.853435
3.12887	2.51546	0.803954
3.51031	2.72165	0.77533
3.20103	2.37629	0.742351
2.14433	1.91237	0.891827
3.25258	2.32474	0.714739
3.04124	2.21649	0.728814
3.57732	2.75773	0.770893
2.93814	2.67526	0.910526
2.92784	2.35567	0.804577
2.80412	2.05155	0.731618
3.27835	2.78351	0.849057
3.61856	2.57732	0.712251
3.19588	2.24742	0.703226
2.78351	2.48454	0.892593
3.01031	1.96907	0.65411
2.68041	1.80412	0.673077
3.45361	3.19588	0.925373
2.6701	2.40206	0.899614
3.37113	2.86598	0.850153
3.13402	2.38144	0.759868
4.1134	3.41237	0.829574
2.94845	2.51546	0.853147
2.62887	2.19588	0.835294
3	2.8866	0.962199
3.5567	2.85567	0.802899
3.06186	2.5567	0.835017
3	2.49485	0.831615
3.30928	3.10309	0.937695
3	2.62887	0.876289
3.93814	3	0.76178
3.04124	2.30928	0.759322
3.41237	2.38144	0.697885
3.39175	2.38144	0.702128
3.5567	2.60825	0.733333
2.81443	1.97938	0.703297
3.04124	2.69072	0.884746
2.70103	2.03093	0.751908
3.54639	2.59794	0.732558
2.65979	2.08247	0.782946
3.62887	2.60825	0.71875
2.47423	1.96907	0.795833
3.64948	2.59794	0.711864
3.40206	2.57732	0.757576
3.14433	2.35052	0.747541
3.31959	2.37113	0.714286
3.21649	2.48454	0.772436
3.28866	2.63918	0.802508
3.27835	2.83505	0.86478
3.06186	2.5567	0.835017
3.21649	2.48454	0.772436
3.79381	3.14433	0.828804
3.13402	2.45361	0.782895
3.07216	2.12371	0.691275
3.04124	2.47423	0.813559
3.14433	2.95876	0.940984
2.80412	1.95876	0.698529
3.42268	2.68041	0.783133
3.2268	2.48454	0.769968
2.92784	2.4433	0.834507
3.19588	2.90722	0.909677
3.50515	2.71134	0.773529
3.5567	2.75258	0.773913
3.20619	2.28866	0.713826
3.65979	2.91753	0.797183
2.80412	2.05155	0.731618
3.20619	3.01031	0.938907
3.27835	2.84536	0.867925
2.70103	2.19588	0.812977
2.85567	2.25773	0.790614
3.30928	2.39175	0.722741
2.91753	2.57732	0.883392
2.83505	2.02062	0.712727
2.97938	2.12371	0.712803
3.09278	2.28866	0.74
3.52577	3.13402	0.888889
3.13402	2.7732	0.884868
3.43299	2.62887	0.765766
3.30928	3.09278	0.934579
3.07216	2.48454	0.808725
3.69072	3.15464	0.854749
3.75258	2.81443	0.75
2.75258	2.39175	0.868914
3.13402	2.50515	0.799342
3.20619	2.28866	0.713826
3.20619	2.62887	0.819936
2.41237	1.85567	0.769231
2.7732	2.19588	0.791822
3.83505	3.02062	0.787634
3.72165	2.79381	0.750693
2.81443	2.16495	0.769231
3.06186	2.27835	0.744108
3.13402	2.70103	0.861842
2.91753	2.49485	0.855124
2.41237	1.97938	0.820513
2.64948	2.47423	0.933852
2.47423	2.04124	0.825
2.94845	1.98969	0.674825
3.2268	2.38144	0.738019
2.7732	2.26804	0.817844
2.74227	2.51546	0.917293
2.94845	2.80412	0.951049
2.60825	1.96907	0.754941
3.52577	3.19588	0.906433
3.64948	3.15464	0.864407
3.45361	2.40206	0.695522
2.49485	2.3299	0.933884
3.29897	2.43299	0.7375
3.74227	2.85567	0.763085
2.96907	2.69072	0.90625
2.76289	2.40206	0.869403
3.96907	3.51546	0.885714
3.03093	2.41237	0.795918
3.5567	2.59794	0.730435
2.91753	1.96907	0.674912
2.54639	2.15464	0.846154
3.41237	2.62887	0.770393
2.53608	2.21649	0.873984
2.70103	2.40206	0.889313
3.16495	2.45361	0.775244
3.01031	2.07216	0.688356
2.71134	1.76289	0.65019
2.91753	2.26804	0.777385
2.76289	2.31959	0.839552
2.84536	2.5567	0.898551
2.98969	2.27835	0.762069
3.79381	3.52577	0.929348
2.7732	2.38144	0.858736
3.40206	2.68041	0.787879
3	2.58763	0.862543
2.63918	2.12371	0.804688
2.73196	2.51546	0.920755
4.03093	3.10309	0.769821
2.5567	2.04124	0.798387
4.38144	3.82474	0.872941
3.95876	3.51546	0.888021
3.25773	2.64948	0.813291
2.63918	2.14433	0.8125
3.51546	2.57732	0.733138
3.16495	2.47423	0.781759
3.57732	3.15464	0.881844
2.8866	2.16495	0.75
2.68041	1.95876	0.730769
2.70103	2.41237	0.89313
3.40206	2.30928	0.678788
3.36082	2.92784	0.871166
2.80412	2.06186	0.735294
2.59794	2.20619	0.849206
2.94845	2.28866	0.776224
3.36082	2.57732	0.766871
2.57732	2.38144	0.924
3.04124	2.4433	0.80339
3.90722	3.50515	0.897098
3.92784	3.09278	0.787402
2.90722	2.45361	0.843972
3.01031	2.27835	0.756849
2.31959	1.89691	0.817778
3.02062	2.17526	0.720137
3.31959	2.50515	0.754658
2.8866	2.26804	0.785714
3.40206	2.59794	0.763636
2.43299	1.96907	0.809322
3.2268	2.39175	0.741214
2.85567	2.2268	0.779783
2.72165	2.26804	0.833333
3.36082	2.70103	0.803681
3.59794	2.76289	0.767908
2.98969	2.26804	0.758621
3.42268	2.75258	0.804217
3.29897	2.63918	0.8
2.81443	2.20619	0.783883
2.86598	2.26804	0.791367
2.6701	1.94845	0.72973
2.91753	2.07216	0.710247
2.85567	2.49485	0.873646
3.5567	3.31959	0.933333
3.36082	2.57732	0.766871
3.35052	2.84536	0.849231
4.23711	3.5567	0.839416
2.94845	2.37113	0.804196
2.54639	1.85567	0.728745
2.68041	2.41237	0.9
2.38144	1.85567	0.779221
3.34021	3.01031	0.901235
2.62887	2.17526	0.827451
2.72165	2.35052	0.863636
3.29897	2.27835	0.690625
3.19588	2.31959	0.725806
3.5567	2.6701	0.750725
2.5567	2.20619	0.862903
2.81443	2.35052	0.835165
3.04124	2.90722	0.955932
3.60825	2.69072	0.745714
3.20619	2.37113	0.73955
2.40206	2.07216	0.862661
2.68041	2.16495	0.807692
3.57732	2.86598	0.801153
2.7732	2.20619	0.795539
2.43299	2.03093	0.834746
2.80412	2.26804	0.808824
3.57732	2.75258	0.769452
2.97938	2.75258	0.923875
2.57732	2.25773	0.876
3.36082	2.62887	0.782209
2.85567	2.41237	0.844765
2.63918	2.12371	0.804688
2.81443	2.17526	0.772894
2.49485	1.6701	0.669421
3.57732	3.17526	0.887608
2.49485	2.07216	0.830579
2.95876	2.53608	0.857143
2.40206	2.03093	0.845494
2.86598	2.54639	0.888489
3.01031	2.62887	0.873288
3.5567	2.81443	0.791304
3.45361	2.60825	0.755224
3.20619	2.28866	0.713826
2.90722	2.07216	0.712766
3.03093	2.92784	0.965986
2.58763	1.95876	0.756972
2.81443	1.97938	0.703297
3.45361	2.8866	0.835821
2.92784	2.28866	0.78169
2.62887	2.34021	0.890196
3.45361	3.07216	0.889552
3.50515	2.58763	0.738235
3.14433	2.70103	0.859016
3.19588	2.54639	0.796774
3.14433	2.49485	0.793443
3.65979	3.46392	0.946479
3.14433	2.35052	0.747541
3.06186	2.35052	0.767677
2.75258	1.96907	0.715356
3.06186	2.62887	0.858586
2.2268	2	0.898148
2.85567	2.35052	0.823105
2.98969	2.37113	0.793103
3.27835	3	0.915094
3.78351	3.41237	0.901907
3.41237	2.47423	0.725076
2.85567	1.87629	0.65704
3.01031	2.51546	0.835616
2.60825	2.18557	0.837945
2.51546	2.43299	0.967213
2.92784	2.40206	0.820423
2.78351	2.06186	0.740741
2.58763	2.21649	0.856574
2.49485	2.08247	0.834711
2.62887	2.31959	0.882353
3.41237	2.59794	0.761329
2.74227	2.17526	0.793233
2.97938	2.35052	0.788927
3.23711	2.18557	0.675159
2.70103	2.26804	0.839695
2.71134	1.89691	0.69962
3.13402	2.62887	0.838816
2.57732	2.14433	0.832
3.3299	2.81443	0.845201
2.80412	1.97938	0.705882
3.13402	2.12371	0.677632
2.85567	2.3299	0.815884
3.20619	2.57732	0.803859
3.13402	2.28866	0.730263
2.35052	1.89691	0.807018
3.20619	2.17526	0.678457
3.04124	2.87629	0.945763
3.01031	2.16495	0.719178
3.20619	2.37113	0.73955
2.78351	1.86598	0.67037
2.68041	1.85567	0.692308
2.70103	2.19588	0.812977
3.19588	3.10309	0.970968
2.84536	2.20619	0.775362
3.41237	2.63918	0.773414
2.69072	2.54639	0.94636
2.92784	2.10309	0.71831
2.6701	2.51546	0.942085
2.5567	1.97938	0.774194
2.97938	2.2268	0.747405
3.29897	3.06186	0.928125
3.03093	2.40206	0.792517
3.50515	2.57732	0.735294
3.09278	2.37113	0.766667
2.48454	1.96907	0.792531
3.18557	2.7732	0.87055
2.5567	2.04124	0.798387
2.5567	2.25773	0.883065
2.71134	1.97938	0.730038
2.64948	2.45361	0.92607
2.70103	2.25773	0.835878
2.7732	2.05155	0.739777
3.04124	2.2268	0.732203
3.64948	2.98969	0.819209
3.2268	2.16495	0.670927
2.47423	2.26804	0.916667
3.29897	2.26804	0.6875
3.41237	2.54639	0.746224
3.14433	2.96907	0.944262
3.10309	2.38144	0.767442
2.91753	2.51546	0.862191
3.13402	2.40206	0.766447
2.26804	1.83505	0.809091
2.87629	2.35052	0.817204
2.49485	1.86598	0.747934
2.43299	1.7732	0.728814
2.90722	2.54639	0.875887
2.87629	2.21649	0.770609
2.94845	2.20619	0.748252
3.01031	2.41237	0.80137
3.40206	2.49485	0.733333
2.98969	2.17526	0.727586
3.43299	2.6701	0.777778
3.15464	2.62887	0.833333
2.72165	2	0.734848
2.90722	1.95876	0.673759
3.14433	2.54639	0.809836
3.06186	2.90722	0.949495
3.09278	3.01031	0.973333
2.98969	2.78351	0.931034
2.96907	2.45361	0.826389
2.69072	2.2268	0.827586
2.91753	2.25773	0.773852
3.41237	2.97938	0.873112
2.83505	2.54639	0.898182
3.42268	2.68041	0.783133
3.29897	2.47423	0.75
2.74227	2	0.729323
3.18557	2.58763	0.812298
3.07216	2.80412	0.912752
2.72165	2.14433	0.787879
2.26804	1.95876	0.863636
2.39175	2.17526	0.909483
2.91753	2.59794	0.890459
2.94845	2.35052	0.797203
3.3299	2.45361	0.736842
2.6701	2.03093	0.760618
2.31959	2.08247	0.897778
2.84536	2.5567	0.898551
2.64948	1.80412	0.680934
3.40206	2.37113	0.69697
2.70103	1.82474	0.675573
2.90722	2.20619	0.758865
2.74227	2.20619	0.804511
3.93814	3.02062	0.767016
2.94845	2.20619	0.748252
3.34021	2.57732	0.771605
2.60825	1.65979	0.636364
2.86598	2.4433	0.852518
2.84536	2.1134	0.742754
3.17526	2.72165	0.857143
2.49485	2.26804	0.909091
2.80412	2.39175	0.852941
2.72165	2.40206	0.882576
2.98969	2.34021	0.782759
2.74227	2.35052	0.857143
3.19588	2.18557	0.683871
3.36082	2.63918	0.785276
2.49485	1.96907	0.789256
2.91753	2.60825	0.893993
2.98969	2.16495	0.724138
3.23711	2.35052	0.726115
2.91753	2.08247	0.713781
3.29897	2.31959	0.703125
2.93814	2.83505	0.964912
2.83505	2.60825	0.92
2.80412	1.96907	0.702206
2.60825	2.49485	0.956522
3.21649	2.86598	0.891026
2.42268	1.87629	0.774468
2.65979	2	0.751938
2.74227	2.21649	0.808271
3.36082	3.29897	0.981595
2.30928	2.07216	0.897321
2.78351	2.68041	0.962963
3.39175	2.98969	0.881459
3.05155	2.2268	0.72973
2.49485	2.07216	0.830579
3.01031	2.30928	0.767123
3.29897	2.26804	0.6875
3.23711	2.27835	0.703822
3.41237	2.37113	0.694864
2.85567	2.49485	0.873646
2.7732	2.31959	0.836431
2.8866	2.5567	0.885714
2.84536	2.5567	0.898551
3.17526	2.5567	0.805195
2.70103	2.06186	0.763359
3.09278	2.63918	0.853333
4.03093	3.50515	0.869565
3.29897	2.72165	0.825
2.89691	1.96907	0.679715
3.54639	2.80412	0.790698
3.39175	2.58763	0.762918
3.3299	2.94845	0.885449
3.09278	2.26804	0.733333
3	2.3299	0.776632
3.01031	2.26804	0.753425
3.2268	2.42268	0.750799
2.95876	2.30928	0.780488
3.17526	2.74227	0.863636
3.31959	2.7732	0.835404
2.91753	2.17526	0.745583
3.02062	2.30928	0.764505
2.5567	2.19588	0.858871
2.70103	2.19588	0.812977
2.76289	2.49485	0.902985
3.64948	3.13402	0.858757
3.16667	2.36842	0.747922
2.80702	2.68421	0.95625
2.60526	2.10526	0.808081
3.25439	2.51754	0.773585
3.2193	2.35965	0.73297
3.35965	2.66667	0.793734
3.08772	2.44737	0.792614
3.79825	2.72807	0.718245
3.18421	2.41228	0.757576
2.66667	2.29825	0.861842
2.67544	2.04386	0.763934
3.42982	2.64035	0.769821
3.17544	2.91228	0.917127
2.68421	2.23684	0.833333
3.0614	2.33333	0.762178
2.70175	2.41228	0.892857
3.50877	3.0614	0.8725
3.95614	3.52632	0.891353
2.67544	2.23684	0.836066
3.50877	2.54386	0.725
3.14035	2.86842	0.913408
2.77193	2.31579	0.835443
2.36842	1.76316	0.744444
3.10526	2.42105	0.779661
2.98246	2.81579	0.944118
3.14035	2.4386	0.776536
3.61404	2.66667	0.737864
3.18421	2.89474	0.909091
2.8866	2.40206	0.832143
2.28866	1.96907	0.86036
3.29897	2.47423	0.75
3.29897	2.37113	0.71875
2.72165	2.30928	0.848485
3.43299	2.49485	0.726727
3.42268	2.38144	0.695783
2.49485	2.12371	0.85124
3.02062	2.17526	0.720137
3.20619	2.48454	0.77492
2.70103	1.82474	0.675573
3.58763	2.84536	0.793103
3.23711	3.06186	0.94586
3.18557	2.40206	0.754045
3.38144	2.3299	0.689024
2.63918	2.03093	0.769531
2.38144	2.10309	0.883117
2.74227	2.2268	0.81203
2.98969	2.63918	0.882759
2.72165	2.6701	0.981061
2.49485	2.21649	0.88843
2.96907	2.53608	0.854167
2.7732	2.35052	0.847584
3.27835	2.3299	0.710692
3.06186	2.2268	0.727273
2.58763	2.08247	0.804781
2.26804	2.16495	0.954545
3.12371	2.20619	0.706271
3.39175	2.68041	0.790274
3.01031	2.25773	0.75
3.64948	3	0.822034
3.23711	2.5567	0.789809
3.04124	2.17526	0.715254
2.06186	1.34021	0.65
3.3299	2.54639	0.764706
2.94845	2.90722	0.986014
3.70103	2.7732	0.749304
3.19588	2.41237	0.754839
3.10309	3	0.966777
3.41237	3.20619	0.939577
3	2.79381	0.931271
3.03093	2.70103	0.891156
3.51546	2.74227	0.780059
3.14433	2.62887	0.836066
2.87629	2.10309	0.731183
2.91753	2.53608	0.869258
3.20619	2.38144	0.742765
3.80412	3.01031	0.791328
3.01031	2.03093	0.674658
2.91753	2.70103	0.925795
3.01031	2.40206	0.797945
3.10309	2.06186	0.664452
3.19588	2.47423	0.774194
3.10309	2.24742	0.724252
2.8866	2.63918	0.914286
2.7732	2.63918	0.951673
2.80412	2.41237	0.860294
2.7732	2.1134	0.762082
2.94845	2.5567	0.867133
3.42268	3.14433	0.918675
3.23711	2.21649	0.684713
3.12371	2.20619	0.706271
3.06701	2.87629	0.937815
3.01546	2.31443	0.767521
2.36082	2.03093	0.860262
2.80412	2.23711	0.797794
2.5	1.8299	0.731959
2.62887	2.31443	0.880392
2.62887	2.18557	0.831373
3.19588	2.91237	0.91129
2.95361	2.19072	0.74171
3.06701	2.29897	0.74958
2.95361	2.33505	0.790576
2.74742	2.53093	0.921201
2.90722	2.47423	0.851064
3.48454	3	0.860947
3.02062	2.25258	0.745734
2.57732	2.31443	0.898
2.28866	2.00515	0.876126
2.95876	2.67526	0.904181
2.71649	2.04639	0.753321
3.13402	2.58247	0.824013
3.85567	3.25258	0.843583
2.79381	2.37629	0.850554
2.69588	2.18557	0.810707
3.69072	2.76289	0.748603
3.50515	2.9433	0.839706
3.17526	2.42268	0.762987
3.40206	2.37113	0.69697
2.25258	2.08247	0.924485
2.32474	2.26804	0.97561
2.72165	1.82474	0.670455
3.15979	2.74742	0.869494
2.95876	2.13402	0.721254
2.46392	2.15979	0.876569
3.60309	2.59794	0.72103
2.42268	2.26804	0.93617
2.4433	2.24742	0.919831
2.70103	2.02062	0.748092
2.72165	2.19588	0.806818
2.78866	2.21649	0.794824
3.25258	3.1134	0.957211
2.69072	1.90722	0.708812
2.75258	2.10309	0.764045
3.51031	2.61856	0.745962
2.90722	2.1701	0.746454
2.91237	2.10309	0.722124
2.95876	2.68041	0.905923
2.64948	2.56701	0.968872
2.55155	1.93299	0.757576
2.90722	2.16495	0.744681
2.43299	2.05155	0.84322
2.65979	1.82474	0.686047
2.26804	1.60309	0.706818
2.82474	2.5	0.885036
4.12371	3.30412	0.80125
2.99485	2.7732	0.92599
3.76289	3.63918	0.967123
2.19072	1.70619	0.778824
2.58763	1.80928	0.699203
2.57732	2.26804	0.88
2.77835	2.40722	0.866419
3.28351	2.70619	0.824176
2.78866	2.57732	0.924214
3.12887	2.32474	0.742998
2.28351	2.14433	0.939052
3.08247	2.69072	0.87291
3.48454	3.11856	0.89497
3.52577	2.51031	0.711988
2.73711	2	0.730697
2.76804	2.10309	0.759777
2.26289	1.87629	0.829157
3.84021	2.83505	0.738255
2.4433	1.75773	0.719409
2.62371	2.21649	0.844794
2.26804	1.54639	0.681818
2.70103	2.43299	0.900763
2.84536	2.24227	0.788043
2.46907	1.80412	0.730689
3	2.58763	0.862543
2.41237	1.7732	0.735043
2.70103	2.1134	0.782443
3.03093	2.28866	0.755102
2.7732	2.26804	0.817844
3.27835	2.45361	0.748428
2.41237	2.15464	0.893162
3.01031	2.43299	0.808219
3.09278	2.68041	0.866667
2.39175	2.28866	0.956897
3.2268	2.35052	0.728435
2.92784	2.43299	0.830986
2.78351	2.20619	0.792593
2.64948	1.89691	0.715953
2.41237	2.16495	0.897436
3.80412	3.31959	0.872629
3.31959	2.84536	0.857143
2.90722	2.03093	0.698582
2.7732	2.05155	0.739777
3.17526	2.40206	0.756494
2.53608	2.07216	0.817073
3.07216	2.51546	0.818792
2.35052	1.82474	0.776316
3.10309	2.17526	0.700997
2.86598	2.31959	0.809353
3.36082	2.78351	0.828221
2.70103	1.95876	0.725191
3.18557	2.57732	0.809061
3.36082	2.96907	0.883436
3.59794	3.09278	0.859599
3.10309	2.16495	0.697674
2.7732	2.16495	0.780669
2.91753	2.54639	0.872792
2.69072	2.12371	0.789272
2.65979	2.37113	0.891473
3.01031	2.24742	0.746575
3.09278	2.72165	0.88
2.90722	2.16495	0.744681
3.06186	2.27835	0.744108
3.83505	2.59794	0.677419
3.75258	2.94845	0.785714
2.50515	2.26804	0.90535
3.09278	2.26804	0.733333
3.34021	2.51546	0.753086
2.60825	2.25773	0.865613
4.14433	3.20619	0.773632
2.41237	2.35052	0.974359
2.8866	1.95876	0.678571
3.03093	2.18557	0.721088
2.46392	2.16495	0.878661
3.69072	3.46392	0.938547
2.74227	2.58763	0.943609
2.86598	2.40206	0.838129
3.59794	3.48454	0.968481
2.63918	2.45361	0.929687
3	2.10309	0.701031
3.5567	2.45361	0.689855
2.89691	2.08247	0.718861
2.57732	1.97938	0.768
3.42268	3.19588	0.933735
3.50515	2.70103	0.770588
3.31959	2.57732	0.776398
3.34021	2.59794	0.777778
3.16495	2.25773	0.713355
3.01031	2.34021	0.777397
2.49485	1.97938	0.793388
3.34021	2.52577	0.756173
3.15464	2.48454	0.787582
2.7732	2.17526	0.784387
2.7732	1.92784	0.695167
2.84536	2.41237	0.847826
2.85567	2.1134	0.740072
3.13402	2.35052	0.75
3.59794	2.57732	0.716332
3.27835	2.35052	0.716981
2.84536	2.40206	0.844203
2.7732	2.40206	0.866171
2.72165	2.30928	0.848485
2.62887	1.93814	0.737255
2.80412	1.95876	0.698529
3.14433	2.48454	0.790164
2.83505	2.21649	0.781818
2.69072	2.38144	0.885057
3.20619	2.37113	0.73955
3.01031	2.49485	0.828767
3.04124	2.63918	0.867797
3.57732	3.15464	0.881844
3.73196	3.14433	0.842541
3.30928	3.20619	0.968847
2.70103	1.82474	0.675573
3.09278	2.7732	0.896667
3.15464	2.20619	0.699346
3.15464	2.65979	0.843137
3.09278	2.90722	0.94
3.29897	2.37113	0.71875
2.35052	2.08247	0.885965
2.62887	2.19588	0.835294
3.09278	2.46392	0.796667
3.42268	2.62887	0.768072
2.97938	2.28866	0.768166
2.96907	2.18557	0.736111
3.13402	2.63918	0.842105
3.40206	2.68041	0.787879
2.60825	1.89691	0.727273
2.70103	2.1134	0.782443
3.06186	2.96907	0.969697
4.03093	2.98969	0.741688
2.80412	2	0.713235
2.86598	2.06186	0.719424
2.42268	2.30928	0.953191
2.91753	2.49485	0.855124
3.75258	3.15464	0.840659
2.62887	2.18557	0.831373
3.23711	2.57732	0.796178
2.87629	2.15464	0.749104
2.60825	2.35052	0.901186
2.65979	2.2268	0.837209
2.89691	2.06186	0.711744
3.01031	2.39175	0.794521
3.14433	2.91753	0.927869
2.37113	1.94845	0.821739
2.90722	2.12371	0.730496
3.19588	2.57732	0.806452
2.74227	2.35052	0.857143
2.48454	1.96907	0.792531
3.18557	3	0.941748
3	2.49485	0.831615
2.05155	1.76289	0.859296
2.43299	2.08247	0.855932
3.13402	2.30928	0.736842
3.57732	2.7732	0.775216
3.29897	2.26804	0.6875
3.83505	3.09278	0.806452
2.91753	2.54639	0.872792
2.4433	2.12371	0.869198
2.76289	1.93814	0.701493
2.62887	2.05155	0.780392
3.81443	3.15464	0.827027
2.57732	2.31959	0.9
2.53608	2.25773	0.890244
3.09278	2.65979	0.86
3.36082	2.62887	0.782209
3.19588	2.16495	0.677419
2.62887	1.89691	0.721569
2.90722	2.05155	0.705674
2.71134	2.48454	0.91635
3.16495	2.94845	0.931596
3.91753	3.25773	0.831579
3.30928	2.37113	0.716511
2.86598	2.26804	0.791367
3.3299	2.47423	0.743034
3.35052	2.91753	0.870769
3.36082	2.72165	0.809816
3.01031	2.72165	0.90411
2.91753	2.20619	0.756184
2.89691	2.81443	0.97153
2.63918	2.27835	0.863281
2.74227	2.05155	0.74812
3.36082	2.54639	0.757669
3.97938	3.92784	0.987047
2.83505	2.02062	0.712727
3.01031	2.69072	0.893836
3.54639	2.81443	0.793605
2.72165	1.91753	0.704545
2.78351	2.35052	0.844444
3.37113	2.6701	0.792049
2.58763	1.85567	0.717131
2.27835	1.95876	0.859729
2.76289	2.12371	0.768657
2.62887	2.19588	0.835294
2.54639	1.85567	0.728745
3.25773	2.47423	0.759494
2.85567	2.40206	0.841155
3.41237	2.47423	0.725076
3.45361	2.72165	0.78806
3.75258	2.75258	0.733516
2.8866	2.16495	0.75
3.16495	2.45361	0.775244
2.94845	2.20619	0.748252
3.09278	2.8866	0.933333
2.80412	2.16495	0.772059
2.81443	1.98969	0.70696
3.01031	2.03093	0.674658
2.92784	2.41237	0.823944
2.94845	2.43299	0.825175
3.14433	2.5567	0.813115
2.87629	2.21649	0.770609
3.45361	2.72165	0.78806
2.68041	1.95876	0.730769
2.52577	1.89691	0.75102
2.5567	2.26804	0.887097
2.49485	1.85567	0.743802
2.78351	2.3299	0.837037
3.29897	2.26804	0.6875
2.86598	2.43299	0.848921
2.51546	2.16495	0.860656
2.89691	2.17526	0.75089
3.19588	2.26804	0.709677
2.58763	2.21649	0.856574
2.38144	2.18557	0.917749
3.34021	2.8866	0.864198
2.68041	2.47423	0.923077
2.63918	2.41237	0.914062
3.10309	2.89691	0.933555
3.21649	2.28866	0.711538
3.03093	2.58763	0.853741
3.19588	2.68041	0.83871
2.7732	2.20619	0.795539
2.87629	2.49485	0.867384
3.82474	2.62887	0.687332
3.36082	2.45361	0.730061
2.63918	2.31959	0.878906
2.70103	2.05155	0.759542
3.29897	3.19588	0.96875
2.80412	2.41237	0.860294
3.41237	2.60825	0.76435
3.19588	2.47423	0.774194
2.49485	1.89691	0.760331
3.01031	2.05155	0.681507
2.85567	2.19588	0.768953
2.92784	2.25773	0.771127
3.3299	2.71134	0.814241
3.92784	2.98969	0.761155
3.38144	2.62887	0.777439
3.01031	2.72165	0.90411
2.81443	2.35052	0.835165
3.20619	2.70103	0.842444
2.96907	2.54639	0.857639
2.83505	2.15464	0.76
3.17526	2.40206	0.756494
2.53608	2.05155	0.808943
3.07216	2.2268	0.724832
3.13402	2.42268	0.773026
3.16495	2.7732	0.876221
3.3299	3.01031	0.904025
2.98969	2.26804	0.758621
3.23711	2.58763	0.799363
3.09278	2.26804	0.733333
2.38144	2.16495	0.909091

## Sheet: OSW_DSL
OSW (µm)	DSL(µm)	OSW/DSL			OSW (µm)	DSL(µm)	OSW/DSL
0.463918	2.93814	0.157895
0.584192	3.04124	0.19209		max	0.841924	4.17526	0.248366
0.584192	2.57732	0.226667		min	0.360825	2.26804	0.148148
0.4811	3.24742	0.148148
0.549828	2.98969	0.183908
0.4811	2.73196	0.176101		avg	0.574951	3.05293	0.188582
0.4811	2.8866	0.166667		std	0.0910561	0.392138	0.0200917
0.515464	2.83505	0.181818
0.618557	2.68041	0.230769
0.360825	2.26804	0.159091
0.652921	3.60825	0.180952
0.532646	2.98969	0.178161
0.635739	2.78351	0.228395
0.446735	2.83505	0.157576
0.515464	3.04124	0.169492
0.56701	2.98969	0.189655
0.515464	2.62887	0.196078
0.56701	2.98969	0.189655
0.56701	2.57732	0.22
0.463918	2.37113	0.195652
0.498282	2.93814	0.169591
0.584192	3.45361	0.169154
0.463918	2.8866	0.160714
0.584192	3.50515	0.166667
0.584192	3.65979	0.159624
0.532646	2.8866	0.184524
0.515464	2.78351	0.185185
0.4811	2.42268	0.198582
0.756303	3.86555	0.195652
0.728291	3.94958	0.184397
0.47619	2.85714	0.166667
0.490196	2.52101	0.194444
0.494845	2.78351	0.177778
0.556777	3.07692	0.180952
0.586081	3.14286	0.18648
0.630037	3.0989	0.20331
0.498168	2.94505	0.169154
0.527473	2.7033	0.195122
0.622711	3.45055	0.180467
0.652015	3.2967	0.197778
0.586081	3.16484	0.185185
0.571429	2.65934	0.214876
0.549451	3.14286	0.174825
0.549451	2.76923	0.198413
0.652015	3.51648	0.185417
0.483516	2.9011	0.166667
0.47619	2.72527	0.174731
0.47619	2.35165	0.202492
0.635739	3.60825	0.17619
0.549828	3.09278	0.177778
0.652921	3.19588	0.204301
0.652921	3.29897	0.197917
0.446735	2.73196	0.163522
0.635739	2.93814	0.216374
0.56701	3.19588	0.177419
0.652921	2.62887	0.248366
0.841924	4.17526	0.201646
0.56701	2.8866	0.196429
0.532646	2.93814	0.181287
0.584192	3.04124	0.19209
0.549828	3.04124	0.180791
0.584192	2.8866	0.202381
0.704467	3.40206	0.207071
0.618557	3.35052	0.184615
0.687285	3.60825	0.190476
0.738832	3.29897	0.223958
0.704467	3.35052	0.210256
0.704467	3.24742	0.216931
0.635739	3.5567	0.178744
0.80756	3.76289	0.214612

## Sheet: coccolits per cell and SA
counted coccolith	coccolith/cell	coccosphere diameter (µm)	surface area (µm2)		coccosphere diameter(µm)	surface area (µm2)	coccolith/cell
10	20	5.7732	104.656	avg	5.53755	97.5229	15.3718
10	20	5.87629	108.427	std	0.629594	22.5027	3.55458
9	18	5.56701	97.3136
8	16	5.36082	90.2387	max	8.04124	203.037	30
6	12	5.05155	80.1269	min	3.91753	48.1896	6
8	16	6.08247	116.169
9	18	5.97938	112.264
9	18	5.46392	93.7428
4	8	4.74227	70.6158
8	16	5.7732	104.656
7	14	5.7732	104.656
8	16	5.6701	100.951
8	16	6.08247	116.169
8	16	6.18557	120.14
6	12	4.84536	73.7194
8	16	6.08247	116.169
6	12	5.15464	83.4308
6	12	5.15464	83.4308
9	18	6.28866	124.178
4	8	4.12371	53.3957
8	16	5.36082	90.2387
8	16	5.97938	112.264
8	16	5.05155	80.1269
6	12	5.36082	90.2387
5	10	4.84536	73.7194
6	12	4.84536	73.7194
6	12	4.84536	73.7194
4	8	4.43299	61.7054
7	14	5.15464	83.4308
6	12	5.25773	86.8014
7	14	5.6701	100.951
4	8	4.12371	53.3957
6	12	5.36082	90.2387
5	10	5.15464	83.4308
7	14	4.84536	73.7194
8	16	5.25773	86.8014
9	18	5.7732	104.656
7	14	5.25773	86.8014
8	16	5.87629	108.427
10	20	5.97938	112.264
8	16	5.25773	86.8014
9	18	5.25773	86.8014
8	16	4.94845	76.8898
8	16	5.46392	93.7428
9	18	5.6701	100.951
8	16	5.05155	80.1269
10	20	5.15464	83.4308
10	20	5.46392	93.7428
9	18	5.46392	93.7428
8	16	5.7732	104.656
12	24	6.18557	120.14
3	6	3.91753	48.1896
5	10	4.43299	61.7054
7	14	5.05155	80.1269
8	16	5.56701	97.3136
7	14	5.56701	97.3136
7	14	5.36082	90.2387
7	14	5.56701	97.3136
6	12	4.84536	73.7194
7	14	5.56701	97.3136
8	16	5.6701	100.951
6	12	4.43299	61.7054
5	10	5.15464	83.4308
7	14	5.56701	97.3136
7	14	5.15464	83.4308
10	20	5.97938	112.264
8	16	5.46392	93.7428
8	16	6.08247	116.169
9	18	5.36082	90.2387
8	16	5.7732	104.656
7	14	5.15464	83.4308
10	20	6.28866	124.178
8	16	6.28866	124.178
10	20	6.28866	124.178
9	18	5.46392	93.7428
6	12	5.25773	86.8014
10	20	5.46392	93.7428
11	22	6.70103	140.998
8	16	5.87629	108.427
9	18	5.97938	112.264
9	18	5.6701	100.951
10	20	5.6701	100.951
9	18	5.56701	97.3136
10	20	5.87629	108.427
8	16	5.46392	93.7428
7	14	5.7732	104.656
9	18	6.70103	140.998
9	18	5.7732	104.656
7	14	5.25773	86.8014
7	14	5.6701	100.951
9	18	5.46392	93.7428
9	18	5.7732	104.656
8	16	5.56701	97.3136
7	14	5.25773	86.8014
7	14	5.46392	93.7428
8	16	5.05155	80.1269
8	16	6.59794	136.693
8	16	5.87629	108.427
9	18	6.18557	120.14
6	12	6.08247	116.169
8	16	5.36082	90.2387
8	16	4.94845	76.8898
9	18	4.94845	76.8898
7	14	5.46392	93.7428
10	20	5.6701	100.951
7	14	5.46392	93.7428
6	12	5.15464	83.4308
8	16	6.08247	116.169
8	16	5.6701	100.951
8	16	5.87629	108.427
9	18	6.70103	140.998
7	14	5.46392	93.7428
8	16	5.56701	97.3136
7	14	6.08247	116.169
8	16	5.25773	86.8014
9	18	6.08247	116.169
13	26	6.90722	149.808
7	14	5.6701	100.951
8	16	6.08247	116.169
15	30	8.04124	203.037
5	10	4.74227	70.6158
8	16	6.08247	116.169
5	10	5.56701	97.3136
8	16	6.90722	149.808
4	8	4.63918	67.5789
4	8	4.3299	58.8687
3	6	4.2268	56.0988
6	12	4.59341	66.2521
6	12	4.83516	73.4095
6	12	6.43956	130.209
8	16	5.03297	79.5386
8	16	5.95604	111.39
8	16	6.02198	113.87
10	20	7.38462	171.232
8	16	6.59341	136.505
6	12	5.18681	84.4755
8	16	5.05495	80.2348
9	18	5.01099	78.8454
10	20	5.45055	93.2847
7	14	5.45055	93.2847
8	16	5.73626	103.321
5	10	4.1978	55.3316
9	18	5.07692	80.934
11	22	5.75824	104.114
10	20	5.91209	109.752
7	14	5.16484	83.7611
7	14	6.17582	119.762
7	14	6.18557	120.14
7	14	6.40351	128.755
7	14	6.84211	146.997
7	14	5	78.5
8	16	5.17544	84.1054
7	14	5.4386	92.876
7	14	5.17544	84.1054
7	14	5.17544	84.1054
8	16	5.26316	86.9806

## Sheet: protococcolith ring
ring Length (µm)	ring width (µm)		ring Length (µm)	ring width (µm)		length/width		length/width
1.6289	1.3402	avg	2.3814	1.8969		0.822764	avg	0.936159
1.7113	1.0619	std	1.4485	0.9794		0.620522	std	0.563368
1.701	1.2371					0.727278
1.7526	1.3918	max	1.85686	1.36866		0.794134	max	0.7394
1.866	1.134	min	0.213721	0.197898		0.607717	min	0.0855176
2.0979	1.6392					0.781353
1.8608	1.3711					0.736834
1.8041	1.2371					0.685716
1.6134	1.2216					0.757159
1.4485	1.1959					0.825613
1.7216	1.1753					0.682679
1.9639	1.732					0.881919
2.3505	1.7526					0.745629
1.7526	1.2371					0.705866
2.0825	1.4021					0.673277
1.7629	1.4742					0.836236
1.6907	1.2371					0.731709
2.0412	1.7526					0.858613
2	1.4845					0.74225
1.9175	1.2887					0.672073
1.4536	1.3608					0.936159
1.8247	1.1649					0.638406
2.2062	1.6082					0.728946
1.9175	1.5464					0.806467
2.3505	1.8041					0.767539
1.6066	1.4835					0.923379
1.8659	1.4571					0.78091
2.0825	1.8969					0.910876
1.6701	1.1134					0.666667
1.6082	1.2371					0.769245
2	1.5361					0.76805
1.9742	1.4021					0.710212
1.4845	1.2887					0.868104
2.1753	1.7113					0.786696
1.6495	1.2577					0.762473
1.9897	1.299					0.652862
1.8351	1.3918					0.758433
1.7732	1.4021					0.790717
1.5361	1.1753					0.765119
1.732	1.3402					0.773788
2.0825	1.567					0.752461
1.8969	1.3196					0.695661
1.7835	1.2784					0.716793
2.3814	1.5052					0.632065
1.866	1.134					0.607717
2.0722	1.2371					0.596998
1.5361	1.1649					0.758349
1.7732	1.1753					0.662813
1.8969	1.4639					0.771733
1.9485	1.2062					0.61904
2.1237	1.5258					0.718463
1.6598	0.9794					0.590071
1.7526	1.134					0.647039
1.9485	1.2062					0.61904
1.8557	1.4845					0.799968
2.0412	1.5361					0.752548
1.8351	1.2474					0.679745
1.8041	1.2165					0.674297
2.0722	1.6443					0.793504
1.6134	1.2887					0.798748
1.9897	1.5722					0.790169
1.8247	1.299					0.711898
2.1959	1.2371					0.563368
1.7732	1.5773					0.889522
1.4845	1.2577					0.847221
1.8041	1.3814					0.7657
1.6495	1.134					0.687481
1.9175	1.2577					0.655906
2.1237	1.3711					0.645618
1.701	1.134					0.666667
1.8041	1.4845					0.822848
1.9794	1.6804					0.848944
